# Supplementary material for: Trajectories of depressive symptoms and risk of cardiovascular disease, cancer and mortality: a prospective cohort study
Source: PubMed Central journal article supplement — Gen Psychiatr. 2024 May 17;37(3):e101456. doi: 10.1136/gpsych-2023-101456 (PMC11103187; doi:10.1136/gpsych-2023-101456), 2024-05-17
Supplement: gpsych-2023-101456supp001.pdf [file gpsych-2023-101456supp001.pdf]

## *Supplement material*

**Table S1. Summary of model fits**

**Table S2. Mean probabilities of trajectories membership for the 6-class model**

**Table S3. Mean probabilities of trajectories membership for the training and test data**

**Table S4. Association between depressive symptoms trajectories and risk of cardiovascular disease, cancer, and all-cause mortality in the subgroups**

**Table S5. Trajectories of depressive symptoms and risk of cardiovascular disease, cancer, and all-cause mortality, excluding events that occurred within the first 2 years of follow up**

**Table S6. Trajectories of depressive symptoms and risk of cardiovascular disease, cancer, and all-cause mortality, including first assessment of PHQ-4 as a additional covariate**

**Figure S1. Timeline of some covariates collection**

**Figure S2. CVD-free survival across different trajectories of depressive symptoms**

**Figure S3. Cancer-free survival across different trajectories of depressive symptoms**

**Figure S4. Death-free survival across different trajectories of depressive symptoms**

**Figure S5. Group-based trajectory modeling in the training and validation cohorts**

**Table S1. Summary of model fits**

| Trajectory | AvePP for groups (%) |      |      |      |      |      |      | BIC       | AIC       |
|------------|----------------------|------|------|------|------|------|------|-----------|-----------|
|            | 1                    | 2    | 3    | 4    | 5    | 6    | 7    |           |           |
| 2          | 90.5                 | 82.2 |      |      |      |      |      | -70084.69 | -70041.05 |
| 3          | 86.5                 | 88.2 | 88.4 |      |      |      |      | -68400.65 | -68329.24 |
| 4          | 80.4                 | 94.8 | 81.8 | 90.1 |      |      |      | -67836.92 | -67737.74 |
| 5          | 82.0                 | 80.7 | 94.0 | 84.6 | 90.8 |      |      | -67477.04 | -67350.08 |
| 6          | 82.7                 | 87.0 | 93.6 | 78.6 | 86.8 | 89.4 |      | -67296.81 | -67142.08 |
| 7          | 82.7                 | 0    | 93.6 | 78.6 | 87.0 | 86.8 | 89.4 | -67331.58 | -67149.08 |

AvePP = Average Posterior Probability

**Table S2. Mean probabilities of trajectories membership for the 6-class model**

| <b>Trajectory</b>   | <b>Number of participants</b> | <b>AvePP (%)</b> | <b>Range of PP (%)</b> |
|---------------------|-------------------------------|------------------|------------------------|
| No symptoms         | 6,407                         | 82.8             | 60.8 – 96.8            |
| Mild-stable         | 11,539                        | 93.6             | 47.8 – 100             |
| Moderate-stable     | 2,183                         | 78.6             | 37.0 – 99.7            |
| Severe-decreasing   | 206                           | 86.1             | 38.7 – 100             |
| Moderate-increasing | 177                           | 86.9             | 41.4 – 100             |
| Severe-stable       | 122                           | 90.1             | 36.4 - 100             |

AvePP = Average Posterior Probability

**Table S3. Mean probabilities of trajectories membership for the training and test data**

| <b>Trajectory</b>   | <b>AvePP (%)</b> | <b>Range of PP (%)</b> |
|---------------------|------------------|------------------------|
| <b>Training</b>     |                  |                        |
| No symptoms         | 83.1             | 64.1 – 96.5            |
| Mild-stable         | 93.8             | 46.2 – 100             |
| Moderate-stable     | 78.9             | 34.6 – 99.9            |
| Severe-decreasing   | 83.4             | 39.2 – 100             |
| Moderate-increasing | 79.0             | 37.6 – 100             |
| Severe-stable       | 88.9             | 45.8 - 100             |
| <b>Validation</b>   |                  |                        |
| No symptoms         | 82.3             | 58.3 – 96.8            |
| Mild-stable         | 93.7             | 47.8 – 100             |
| Moderate-stable     | 79.3             | 47.4 – 99.7            |
| Severe-decreasing   | 85.8             | 41.3 – 100             |
| Moderate-increasing | 88.4             | 50.2 – 100             |
| Severe-stable       | 94.9             | 46.5 - 100             |

AvePP = Average Posterior Probability

**Table S4. Association between depressive symptoms trajectories and risk of cardiovascular disease, cancer, and all-cause mortality in the subgroups**

| Subgroups                        | Trajectory of depressive symptoms, hazard ratios (95% CIs) |                  |                  |                   |                     |                   |
|----------------------------------|------------------------------------------------------------|------------------|------------------|-------------------|---------------------|-------------------|
|                                  | No symptoms                                                | Mild-stable      | Moderate-stable  | Severe-decreasing | Moderate-increasing | Severe-stable     |
| <b>Female</b>                    |                                                            |                  |                  |                   |                     |                   |
| CVD incidence                    | 1.00 (ref)                                                 | 1.19 (0.98,1.44) | 1.39 (1.03,1.87) | 1.63 (0.85,3.13)  | 0.98 (0.36,2.67)    | 3.99 (1.95,8.17)  |
| Cancer incidence                 | 1.00 (ref)                                                 | 0.90 (0.74,1.09) | 1.24 (0.93,1.64) | 0.61 (0.25,1.51)  | 0.96 (0.39,2.37)    | 0.30 (0.04,2.17)  |
| All-cause mortality              | 1.00 (ref)                                                 | 0.92 (0.67,1.28) | 1.07 (0.65,1.78) | 1.20 (0.37,3.91)  | 2.65 (0.93,7.49)    | 3.85 (1.28,11.59) |
| <b>Male</b>                      |                                                            |                  |                  |                   |                     |                   |
| CVD incidence                    | 1.00 (ref)                                                 | 1.19 (1.03,1.38) | 1.26 (0.95,1.66) | 1.15 (0.43,3.12)  | 1.93 (0.94,3.97)    | 2.48 (1.28,4.80)  |
| Cancer incidence                 | 1.00 (ref)                                                 | 1.13 (0.96,1.32) | 1.06 (0.76,1.46) | 1.37 (0.51,3.70)  | 0.93 (0.29,2.94)    | 0.68 (0.17,2.77)  |
| All-cause mortality              | 1.00 (ref)                                                 | 1.17 (0.91,1.50) | 1.42 (0.90,2.24) | NA                | 1.80 (0.55,5.90)    | 2.72 (0.96,7.71)  |
| <b>Age ≤ 60 years</b>            |                                                            |                  |                  |                   |                     |                   |
| CVD incidence                    | 1.00 (ref)                                                 | 1.10 (0.91,1.33) | 1.24 (0.95,1.64) | 1.15 (0.56,2.35)  | 1.53 (0.77,3.04)    | 2.34 (1.28,4.28)  |
| Cancer incidence                 | 1.00 (ref)                                                 | 0.97 (0.81,1.15) | 1.16 (0.89,1.51) | 1.01 (0.49,2.07)  | 0.74 (0.30,1.80)    | 0.19 (0.03,1.35)  |
| All-cause mortality              | 1.00 (ref)                                                 | 0.89 (0.64,1.24) | 0.97 (0.59,1.58) | 0.37 (0.05,2.71)  | 1.76 (0.62,4.99)    | 1.69 (0.56,5.06)  |
| <b>Age &gt; 60 years</b>         |                                                            |                  |                  |                   |                     |                   |
| CVD incidence                    | 1.00 (ref)                                                 | 1.25 (1.08,1.46) | 1.34 (0.99,1.83) | 1.95 (0.86,4.42)  | 1.11 (0.35,3.49)    | 3.41 (1.46,7.96)  |
| Cancer incidence                 | 1.00 (ref)                                                 | 1.07 (0.90,1.27) | 1.26 (0.88,1.80) | 0.39 (0.05,2.79)  | 1.50 (0.47,4.74)    | 1.60 (0.39,6.52)  |
| All-cause mortality              | 1.00 (ref)                                                 | 1.16 (0.91,1.48) | 1.55 (0.96,2.48) | 1.53 (0.37,6.34)  | 2.71 (0.83,8.80)    | 6.25 (2.24,17.43) |
| <b>BMI ≤ 25 kg/m<sup>2</sup></b> |                                                            |                  |                  |                   |                     |                   |
| CVD incidence                    | 1.00 (ref)                                                 | 1.34 (1.09,1.64) | 1.35 (0.93,1.96) | 0.95 (0.23,3.87)  | NA                  | 5.09 (2.03,12.75) |

|                                     |            |                  |                  |                  |                   |                   |
|-------------------------------------|------------|------------------|------------------|------------------|-------------------|-------------------|
| Cancer incidence                    | 1.00 (ref) | 1.02 (0.83,1.25) | 1.15 (0.80,1.66) | 0.73 (0.18,2.98) | 0.85 (0.21,3.47)  | 1.62 (0.40,6.67)  |
| All-cause mortality                 | 1.00 (ref) | 1.25 (0.90,1.75) | 1.55 (0.88,2.72) | 1.09 (0.15,8.16) | 1.60 (0.22,11.93) | 7.26 (2.46,21.44) |
| <b>BMI &gt; 25 kg/m<sup>2</sup></b> |            |                  |                  |                  |                   |                   |
| CVD incidence                       | 1.00 (ref) | 1.12 (0.98,1.30) | 1.28 (1.01,1.63) | 1.60 (0.89,2.87) | 1.73 (0.96,3.13)  | 2.42 (1.37,4.27)  |
| Cancer incidence                    | 1.00 (ref) | 1.01 (0.87,1.18) | 1.25 (0.96,1.61) | 0.96 (0.45,2.06) | 0.95 (0.42,2.15)  | 0.20 (0.03,1.46)  |
| All-cause mortality                 | 1.00 (ref) | 0.95 (0.74,1.21) | 1.09 (0.71,1.66) | 0.73 (0.18,2.98) | 2.18 (0.93,5.11)  | 1.74 (0.61,4.95)  |
| <b>Other education level</b>        |            |                  |                  |                  |                   |                   |
| CVD incidence                       | 1.00 (ref) | 1.26 (1.08,1.46) | 1.26 (0.97,1.62) | 1.84 (1.00,3.40) | 1.50 (0.70,3.21)  | 3.93 (2.37,6.53)  |
| Cancer incidence                    | 1.00 (ref) | 1.03 (0.88,1.21) | 1.18 (0.91,1.55) | 0.85 (0.35,2.08) | 0.42 (0.10,1.70)  | 0.68 (0.21,2.15)  |
| All-cause mortality                 | 1.00 (ref) | 1.24 (0.96,1.60) | 1.39 (0.92,2.10) | 0.93 (0.23,3.81) | 2.25 (0.81,6.25)  | 3.92 (1.74,8.86)  |
| <b>College/university</b>           |            |                  |                  |                  |                   |                   |
| CVD incidence                       | 1.00 (ref) | 1.09 (0.91,1.32) | 1.47 (1.06,2.04) | 0.83 (0.26,2.61) | 1.40 (0.56,3.49)  | 0.64 (0.09,4.73)  |
| Cancer incidence                    | 1.00 (ref) | 1.00 (0.82,1.20) | 1.28 (0.92,1.78) | 0.95 (0.35,2.57) | 1.51 (0.65,3.50)  | NA                |
| All-cause mortality                 | 1.00 (ref) | 0.83 (0.60,1.14) | 1.18 (0.64,2.16) | 0.83 (0.11,6.05) | 2.20 (0.64,7.52)  | 1.68 (0.20,14.15) |
| <b>TDI &lt; median (-2.71)</b>      |            |                  |                  |                  |                   |                   |
| CVD incidence                       | 1.00 (ref) | 1.18 (1.04,1.33) | 1.31 (1.06,1.62) | 1.48 (0.84,2.58) | 1.24 (0.63,2.41)  | 2.92 (1.70,5.00)  |
| Cancer incidence                    | 1.00 (ref) | 1.03 (0.91,1.18) | 1.25 (1.01,1.56) | 0.91 (0.45,1.85) | 0.71 (0.29,1.74)  | 0.65 (0.21,2.04)  |
| All-cause mortality                 | 1.00 (ref) | 1.04 (0.85,1.28) | 1.25 (0.87,1.80) | 0.96 (0.30,3.03) | 2.33 (1.00,5.38)  | 4.50 (2.12,9.56)  |
| <b>TDI ≥ median (-2.71)</b>         |            |                  |                  |                  |                   |                   |
| CVD incidence                       | 1.00 (ref) | 1.40 (0.87,2.26) | 1.36 (0.68,2.71) | 1.06 (0.14,8.07) | 3.45 (0.97,12.20) | 4.09 (1.28,13.09) |
| Cancer incidence                    | 1.00 (ref) | 0.90 (0.57,1.41) | 1.02 (0.52,1.99) | 0.63 (0.08,4.75) | 2.03 (0.59,7.03)  | NA                |
| All-cause mortality                 | 1.00 (ref) | 1.50 (0.76,2.93) | 1.50 (0.57,3.93) | NA               | 2.08 (0.25,17.29) | NA                |

All adjusted for age (years), sex (female or male), ethnicity (white or others), Townsend Deprivation Index, education (college/university or others), and body-mass-index, smoke status (never, former, or current), alcohol frequency (never, occasions, 1-3 times/month, 1-2 times/week, 3-4 times/week, and daily or almost daily), diet scores (0 to 7), sleep scores (0 to 5), history of hypertension (yes or no), and history of diabetes (yes or no), and use of antidepressants (yes or no).

**Table S5. Trajectories of depressive symptoms and risk of cardiovascular disease, cancer, and all-cause mortality, excluding events that occurred within the first 2 years of follow up**

| Trajectory          | Outcomes, hazard ratios (95% CIs) |                  |                     |
|---------------------|-----------------------------------|------------------|---------------------|
|                     | CVD incidence                     | Cancer incidence | All-cause mortality |
| No symptoms         | 1.00 (ref)                        | 1.00 (ref)       | 1.00 (ref)          |
| Mild-stable         | 1.17 (1.01,1.35)                  | 1.15 (0.99,1.34) | 1.07 (0.85,1.34)    |
| Moderate-stable     | 1.29 (1.01,1.65)                  | 1.31 (1.01,1.70) | 1.35 (0.92,1.98)    |
| Severe-decreasing   | 1.55 (0.82,2.93)                  | 0.77 (0.32,1.88) | 1.12 (0.35,3.58)    |
| Moderate-increasing | 1.83 (0.96,3.47)                  | 1.11 (0.49,2.53) | 2.19 (0.87,5.51)    |
| Severe-stable       | 2.78 (1.51,5.10)                  | 0.49 (0.12,2.01) | 4.34 (1.93,9.73)    |

All adjusted for age (years), sex (female or male), ethnicity (white or others), Townsend Deprivation Index, education (college/university or others), and body-mass-index, smoke status (never, former, or current), alcohol frequency (never, occasions, 1-3 times/month, 1-2 times/week, 3-4 times/week, and daily or almost daily), diet scores (0 to 7), sleep scores (0 to 5), history of hypertension (yes or no), and history of diabetes (yes or no), and use of antidepressants (yes or no).



**Table S6. Trajectories of depressive symptoms and risk of cardiovascular disease, cancer, and all-cause mortality, including first assessment of PHQ-4 as an additional covariate**

| Trajectory          | Outcomes, hazard ratios (95% CIs) |                  |                     |
|---------------------|-----------------------------------|------------------|---------------------|
|                     | CVD incidence                     | Cancer incidence | All-cause mortality |
| No symptoms         | 1.00 (ref)                        | 1.00 (ref)       | 1.00 (ref)          |
| Mild-stable         | 1.15 (1.01,1.32)                  | 1.04 (0.91,1.20) | 1.12 (0.89,1.40)    |
| Moderate-stable     | 1.20 (0.90,1.59)                  | 1.31 (0.97,1.77) | 1.48 (0.92,2.40)    |
| Severe-decreasing   | 1.16 (0.57,2.36)                  | 1.06 (0.45,2.46) | 1.23 (0.30,5.01)    |
| Moderate-increasing | 1.33 (0.72,2.46)                  | 1.01 (0.48,2.11) | 2.60 (1.13,6.01)    |
| Severe-stable       | 2.36 (1.19,4.70)                  | 0.57 (0.16,2.03) | 4.72 (1.54,14.47)   |

All adjusted for age (years), sex (female or male), ethnicity (white or others), Townsend Deprivation Index, education (college/university or others), and body-mass-index, smoke status (never, former, or current), alcohol frequency (never, occasions, 1-3 times/month, 1-2 times/week, 3-4 times/week, and daily or almost daily), diet scores (0 to 7), sleep scores (0 to 5), history of hypertension (yes or no), and history of diabetes (yes or no), use of antidepressants (yes or no), and the score of PHQ-4 in the first interview (0 to 12).

**Figure S1. Timeline of some covariates collection**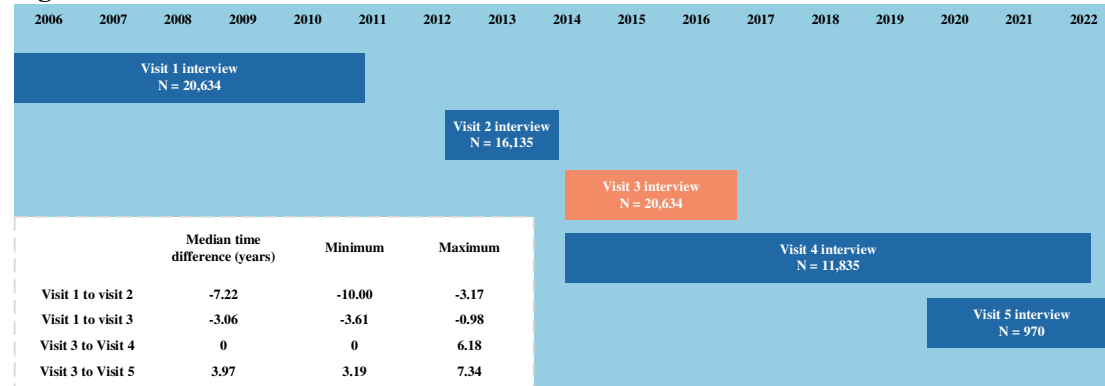

The covariates with repeated measurements including education level, BMI, smoking status, alcohol frequency, diet scores, and sleep scores were obtained from touchscreen questionnaires at the time-point closest to the baseline of this study.

**Figure S2. CVD-free survival across different trajectories of depressive symptoms**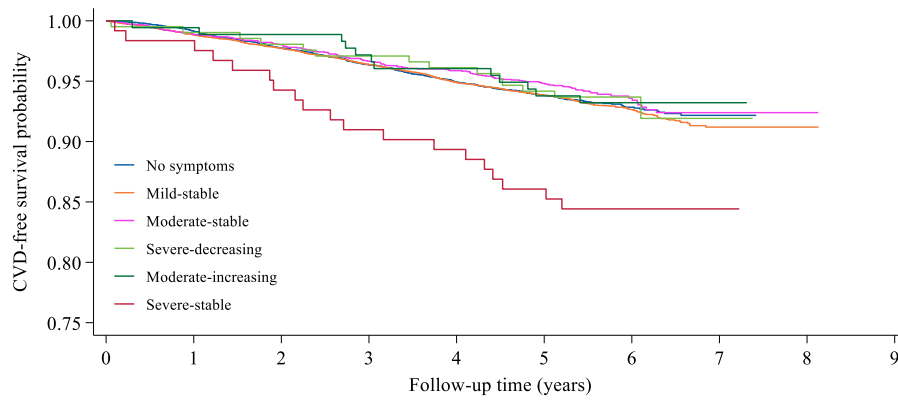

|                              | 0     | 1     | 2     | 3     | 4     | 5     | 6    | 7   | 8 | 9 |
|------------------------------|-------|-------|-------|-------|-------|-------|------|-----|---|---|
| Number at risk               |       |       |       |       |       |       |      |     |   |   |
| No symptoms                  | 6407  | 6352  | 6264  | 6173  | 6082  | 6011  | 1346 | 195 | 0 | 0 |
| Mild-stable symptoms         | 11539 | 11405 | 11277 | 11122 | 10950 | 10828 | 2681 | 466 | 5 | 0 |
| Moderate-stable symptoms     | 2183  | 2159  | 2140  | 2110  | 2093  | 2070  | 530  | 89  | 1 | 0 |
| Severe-decreasing symptoms   | 206   | 204   | 202   | 200   | 198   | 194   | 63   | 10  | 0 | 0 |
| Moderate-increasing symptoms | 177   | 176   | 175   | 172   | 170   | 166   | 48   | 9   | 0 | 0 |
| Severe-stable symptoms       | 122   | 120   | 115   | 111   | 109   | 105   | 31   | 6   | 0 | 0 |

The figure shows Kaplan-Meier survival data for cardiovascular disease for different trajectories of depressive symptoms in 20,634 individuals ( $P = 0.006$  by log-rank test).

**Figure S3. Cancer-free survival across different trajectories of depressive symptoms**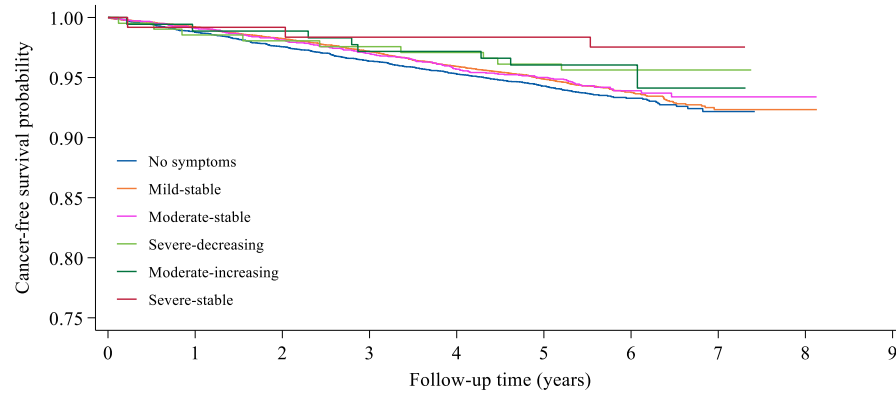

| Number at risk               |       | 0     | 1     | 2     | 3     | 4     | 5    | 6   | 7 | 8 | 9 |
|------------------------------|-------|-------|-------|-------|-------|-------|------|-----|---|---|---|
| No symptoms                  | 6407  | 6328  | 6251  | 6174  | 6106  | 6041  | 1347 | 198 | 0 | 0 | 0 |
| Mild-stable symptoms         | 11539 | 11446 | 11337 | 11213 | 11069 | 10948 | 2708 | 468 | 5 | 0 | 0 |
| Moderate-stable symptoms     | 2183  | 2164  | 2142  | 2117  | 2089  | 2074  | 531  | 83  | 1 | 0 | 0 |
| Severe-decreasing symptoms   | 206   | 203   | 202   | 201   | 200   | 198   | 61   | 10  | 0 | 0 | 0 |
| Moderate-increasing symptoms | 177   | 175   | 175   | 172   | 172   | 170   | 51   | 8   | 0 | 0 | 0 |
| Severe-stable symptoms       | 122   | 121   | 121   | 120   | 120   | 120   | 35   | 7   | 0 | 0 | 0 |

The figure shows Kaplan-Meier survival data for cancer for different trajectories of depressive symptoms in 20,634 individuals ( $P = 0.154$  by log-rank test)

**Figure S4. Death-free survival across different trajectories of depressive symptoms**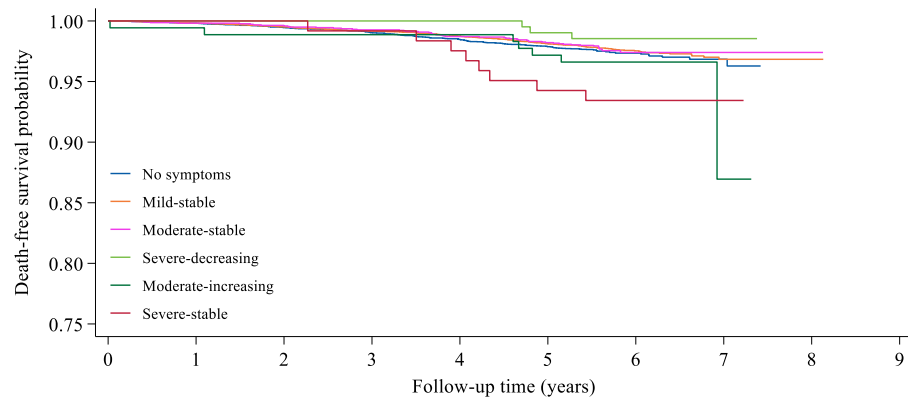

| Number at risk               | 0     | 1     | 2     | 3     | 4     | 5     | 6    | 7   | 8 | 9 |
|------------------------------|-------|-------|-------|-------|-------|-------|------|-----|---|---|
| No symptoms                  | 6407  | 6395  | 6372  | 6345  | 6309  | 6271  | 1408 | 206 | 0 | 0 |
| Mild-stable symptoms         | 11539 | 11518 | 11483 | 11443 | 11396 | 11322 | 2798 | 485 | 5 | 0 |
| Moderate-stable symptoms     | 2183  | 2179  | 2174  | 2167  | 2155  | 2144  | 550  | 90  | 1 | 0 |
| Severe-decreasing symptoms   | 206   | 206   | 206   | 206   | 206   | 204   | 65   | 10  | 0 | 0 |
| Moderate-increasing symptoms | 177   | 176   | 175   | 175   | 175   | 172   | 53   | 8   | 0 | 0 |
| Severe-stable symptoms       | 122   | 122   | 122   | 121   | 119   | 115   | 34   | 6   | 0 | 0 |

The figure shows Kaplan-Meier survival data for mortality for different trajectories of depressive symptoms in 20,634 individuals ( $P = 0.032$  by log-rank test)

**Figure S5. Group-based trajectory modeling in the training and validation cohorts**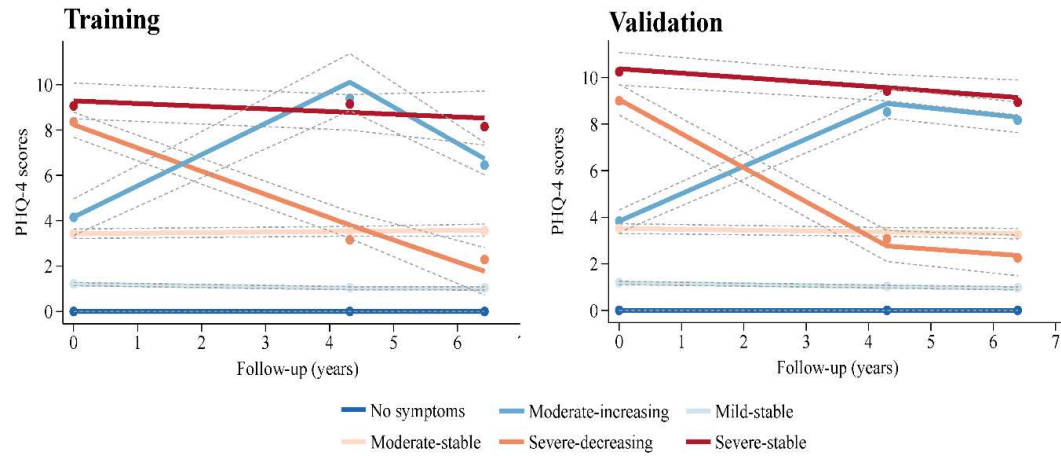

Group-based trajectory modeling of depressive symptoms in the training and validation cohorts. Using group-based trajectory modeling, six distinct trajectories were identified in the training and validation cohorts. Dotted lines represent confidence bands for the calculated trajectory.
